Abstract  
Posters

---

AGING AND DEMENTIA: ALZHEIMER

A - 06

**MRI and Neuropsychological Change During Conversion from Normal/MCI to Alzheimer's Disease**

*Paredes J, Prince T, Simpson A, Daniel M*

**Objective:** Analyze neurocognitive and structural brain changes associated with conversion from normal cognition/MCI to Alzheimer's disease (AD). **Method:** Thirty-two participants from the National Alzheimer's Coordinating Center included 22 women; mean (SD): age = 77.06 (8.1); education = 14.59 (3.5). All had either normal cognition or MCI at first visit when MRI was obtained and were diagnosed with AD at follow-up MRI; mean time between MRI's = 4.1 years. Imaging of Dementia & Aging lab performed calculations for MRI structural change using Linux-based software. Participants took neuropsychological tests within three months of each MRI visit. **Results:** MRI structural degeneration occurred in: left ( $d = .46$ ) and right ( $d = .47$ ) entorhinal cortical thickness; left ( $d = .82$ ) and right ( $d = .95$ ) hippocampal volume; left ( $d = .74$ ) and right ( $d = .43$ ) middle temporal gray matter volume; left parahippocampal cortical thickness ( $d = .55$ ); total white matter volume ( $d = .55$ ); total brain volume ( $d = .78$ ); and total CSF volume ( $d = 1.14$ ). Significant neuropsychological decline included Animal fluency ( $d = 1.02$ ), Vegetable fluency ( $d = .69$ ), Digit Symbol ( $d = .53$ ), Trails B ( $d = .42$ ), and Digit Span Backward ( $d = .56$ ). There was not a significant change in Logical Memory. **Conclusions:** Participants who converted from normal cognition/MCI to AD showed MRI degeneration in medial temporal structures as well as generalized atrophy and white matter loss. These structural changes accompanied a significant decline in semantic verbal fluency, working memory, and processing speed. There was not a significant change in verbal memory.
